# Supplementary material
Source: PubMed Central journal article supplement (PMC3930080)

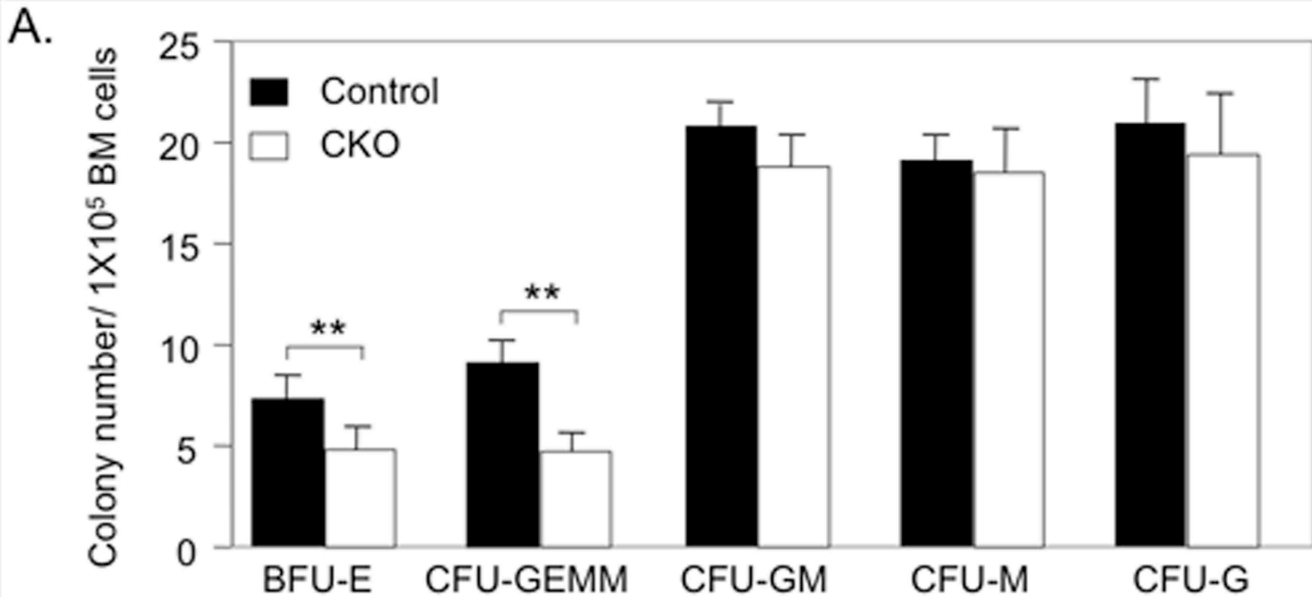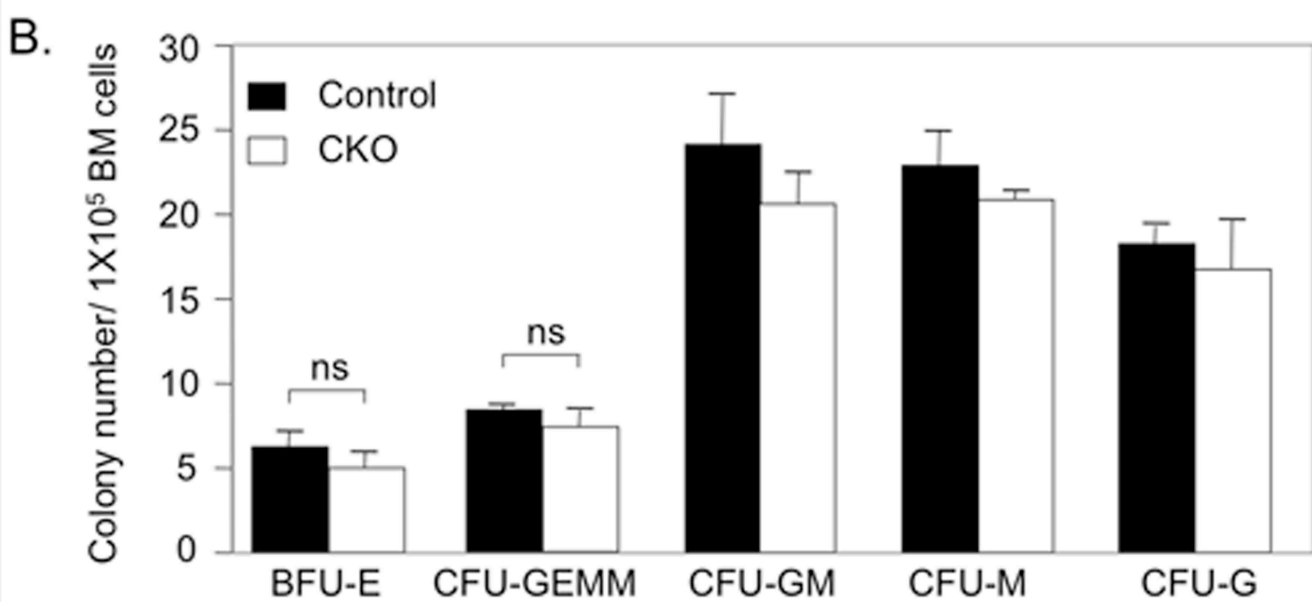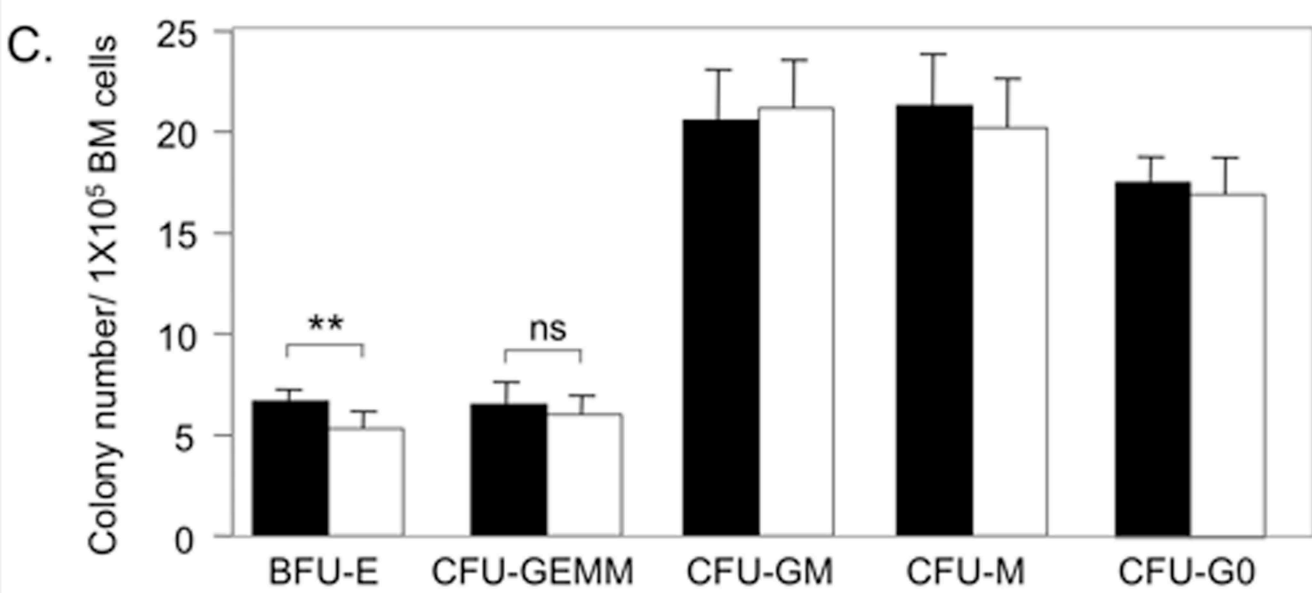

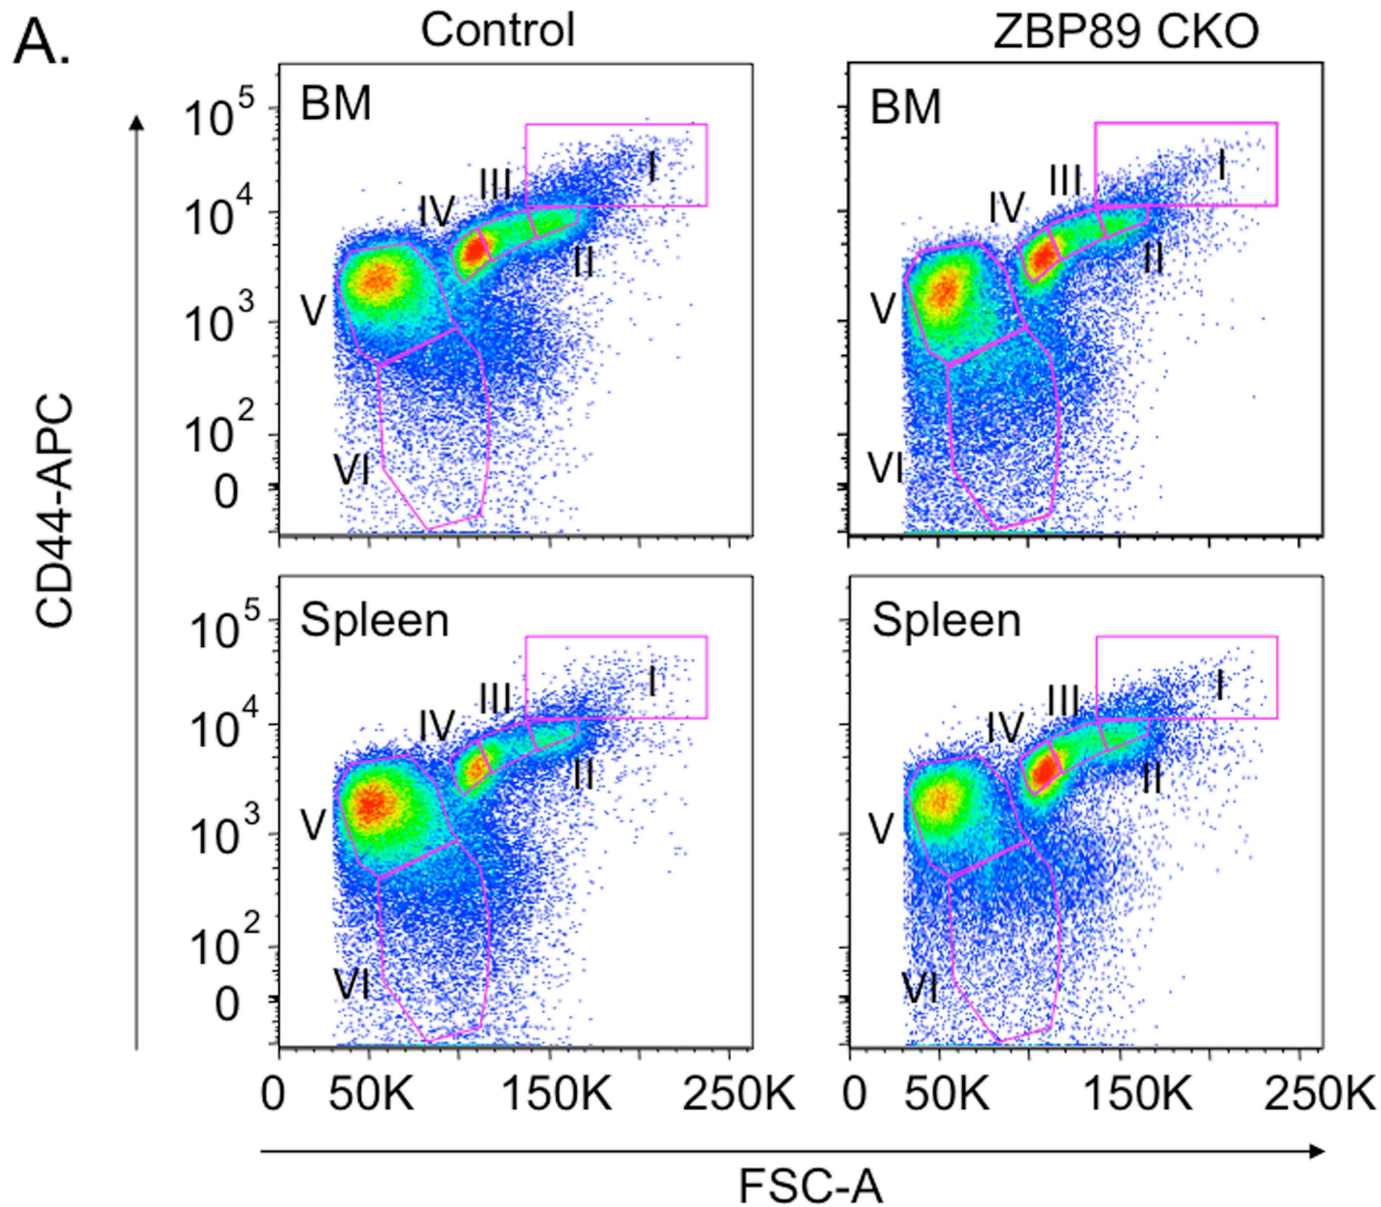

**B.**

| Erythroblast   | Pro (%)   | Baso (%)   | Poly (%)   | Ortho (%)  |
|----------------|-----------|------------|------------|------------|
| <b>BM:</b>     |           |            |            |            |
| Control (n=3)  | 7.77±0.37 | 15.39±0.96 | 30.9±4.12  | 45.92±4.68 |
| CKO (n=3)      | 6.05±0.85 | 12.78±1.17 | 27.8±1.15  | 53.32±2.87 |
| P value        | 0.03      | 0.04       | 0.28       | 0.08       |
| <b>Spleen:</b> |           |            |            |            |
| Control (n=3)  | 4.73±0.81 | 11.78±1.86 | 28.20±2.05 | 55.27±3.72 |
| CKO (n=3)      | 7.2± 1.03 | 15.22±0.76 | 28.09±4.09 | 49.46±5.01 |
| P value        | 0.03      | 0.04       | 0.96       | 0.18       |

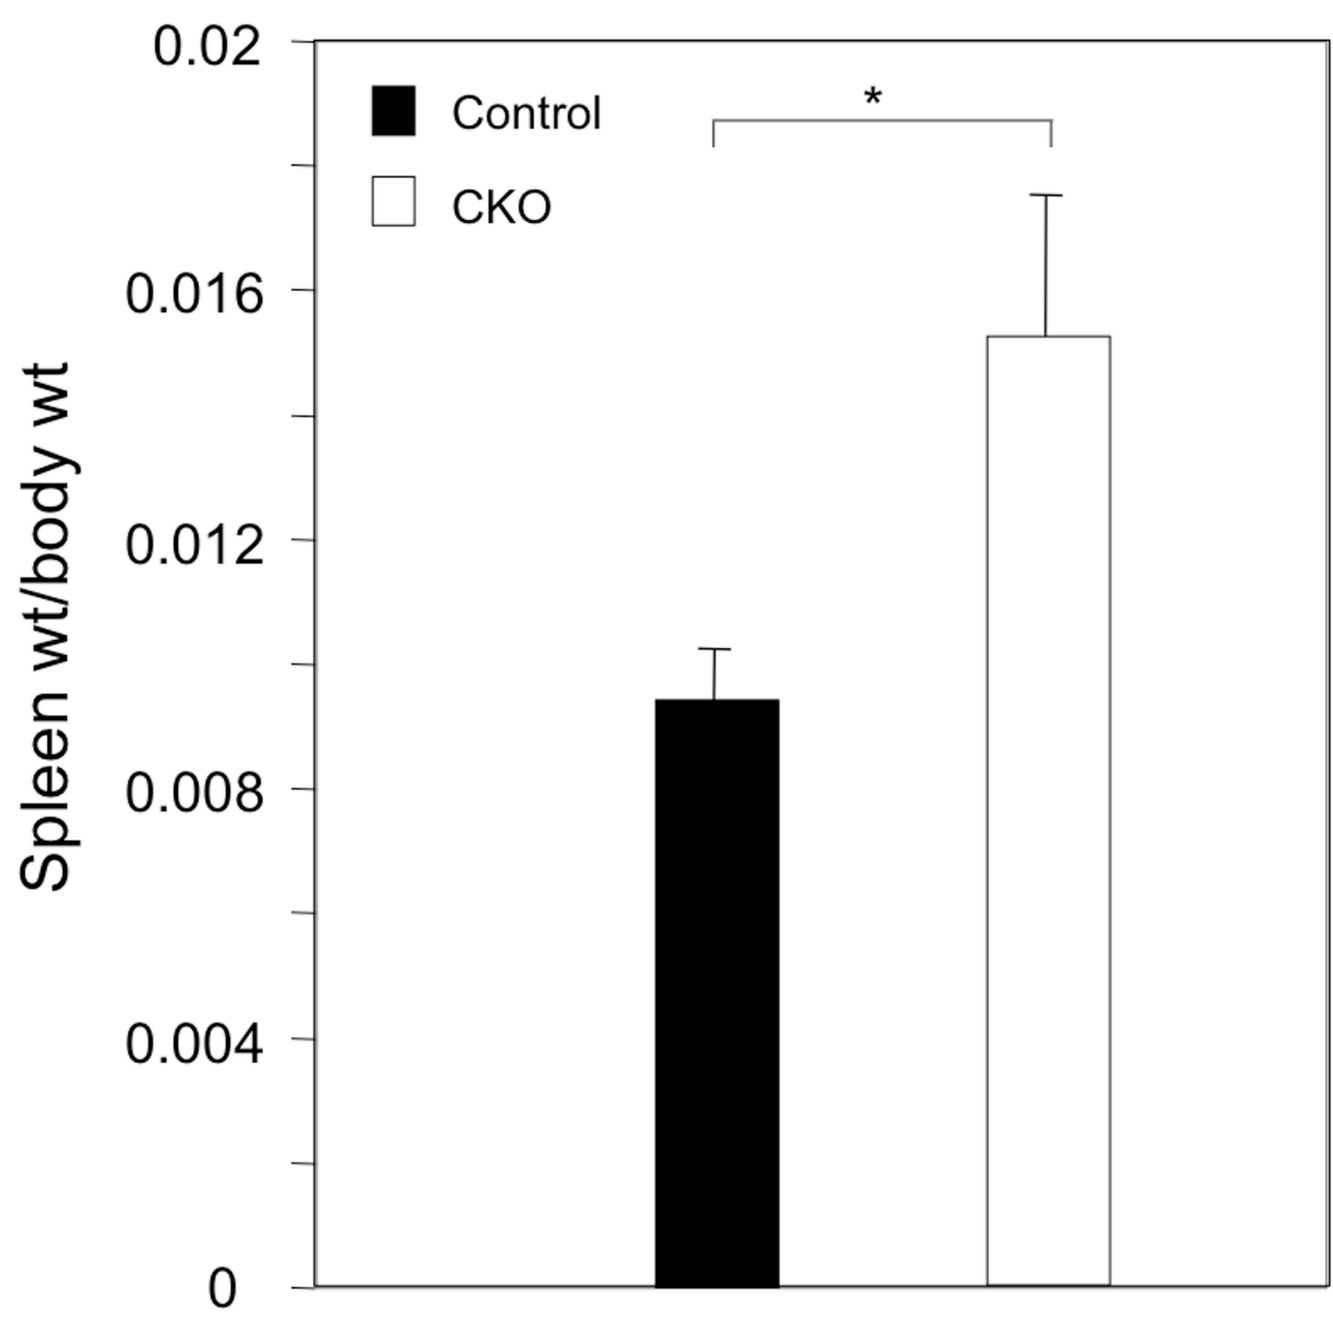

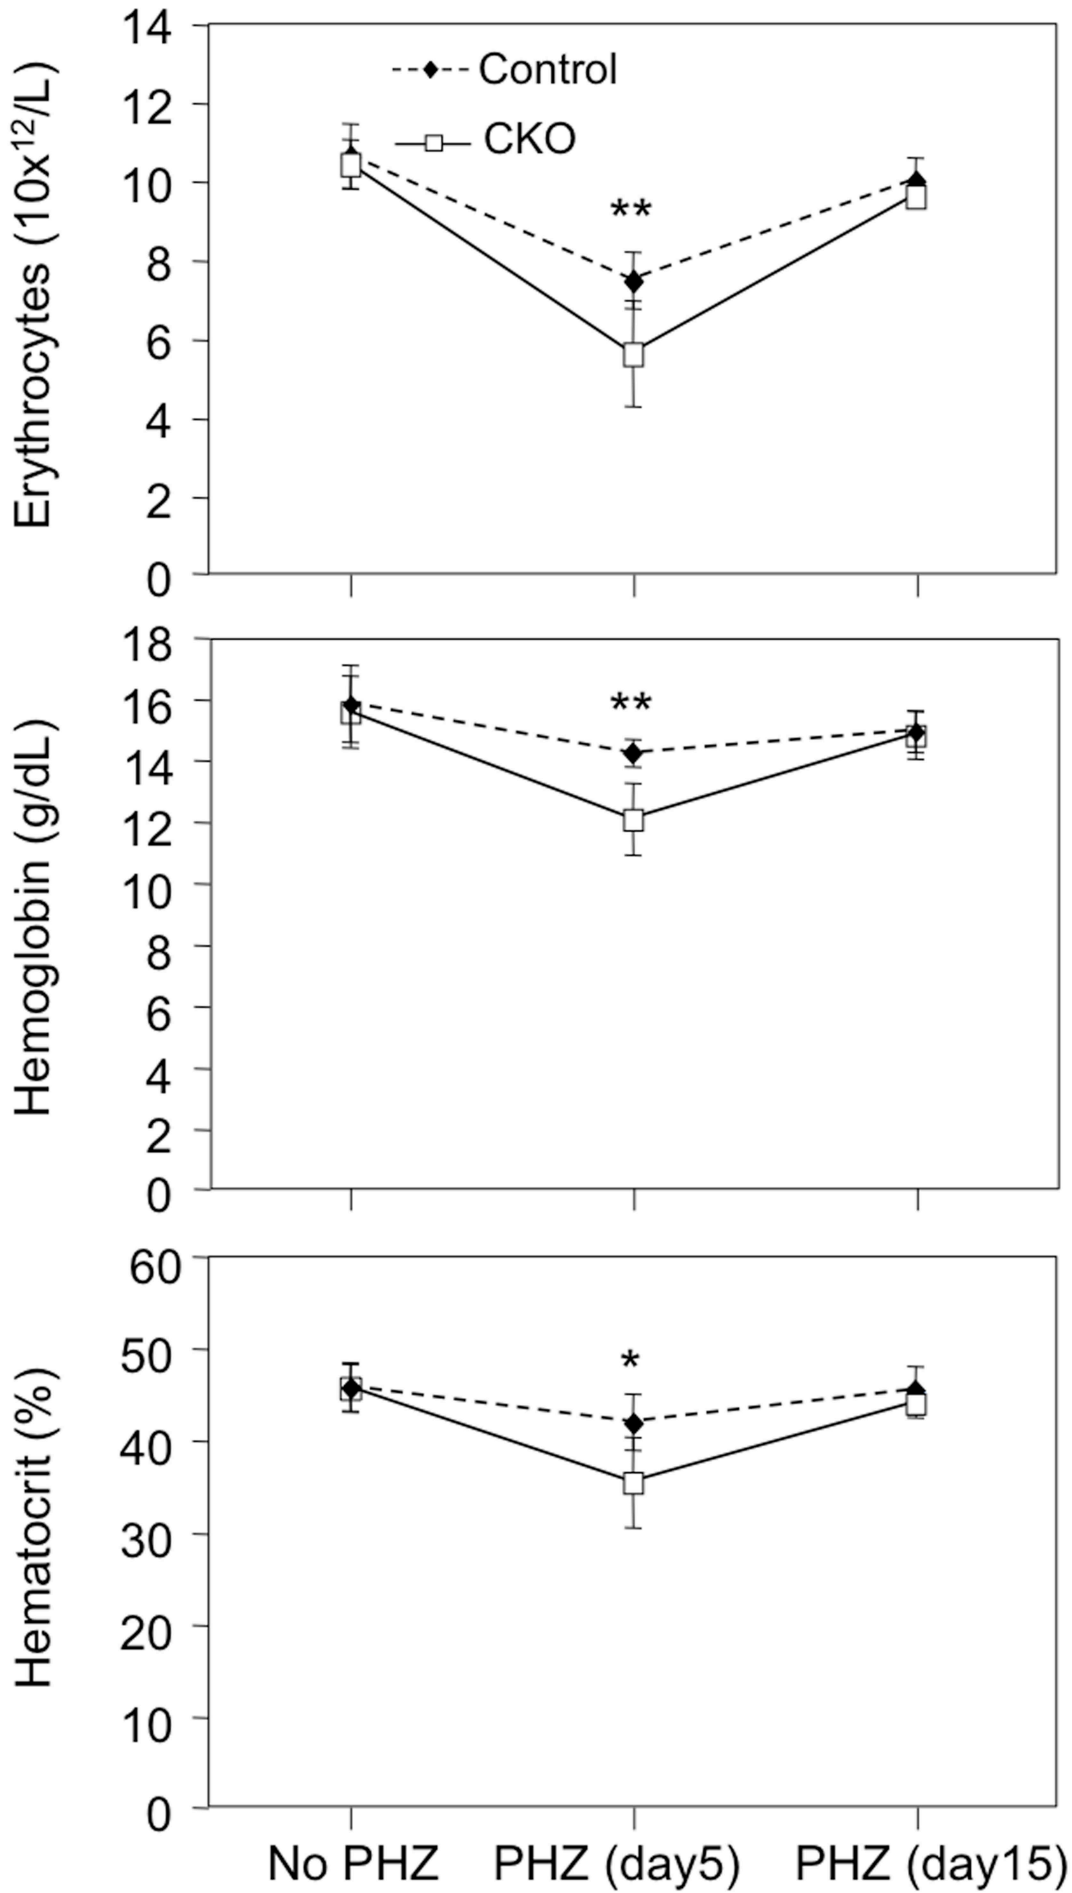

Supplement: NIHMS541178-supplement-Supp_Fig_S1-S5.pdf [file NIHMS541178-supplement-Supp_Fig_S1-S5.pdf]
